# Supplementary material for: The Community, the Workplace, and Public Health Measures: A Qualitative Study of Factors that Impacted the Wellbeing of Rural Health Service Staff in Victoria, Australia, during the COVID-19 Pandemic
Source: Hindawi journal article supplement (doi:10.1155/2023/5556980), 2023-06-21
Supplement: f1 [file 5556980.f1.docx]

SUPPORTING INFORMATION

*Supplementary file 1 – Interview guide including participant demographic questions*

**Interview guide**

Thank you for agreeing to participate in an interview and for completing the consent form. Based on your reading of the participant information and consent form, do you have any questions about this research project?

As a reminder, I will be recording this interview and a professional company bound to confidentiality will transcribe the audio-recording. Is this ok?

The data obtained from this interview will be analysed along with other interview data and the findings of this study (including the survey data) and will likely be published in peer-reviewed journals and presented at conferences. We can send you a copy of the final report on request.

I will ask you a series of questions with some prompts. If there are any questions you would prefer not to answer, please say so – there is no need to explain why you do not wish to answer.

As a reminder, this research study is about the impacts of the COVID-19 pandemic on healthcare service staff across regional and rural Victoria. We are interested to know about your experiences and perspectives on your wellbeing during the COVID-19 pandemic, with a focus on the factors, processes or resources that supported or inhibited your wellbeing within your workplace. We are also interested in what you think health services can do to improve the way(s) they support and promote staff wellbeing as we recover from the pandemic.

Before I ask the first interview question, do you have any other questions for me?

Q1. Firstly, can you please tell me generally about your role at your health service and how this has changed over the course of the pandemic?

Q2. How do you consider that the COVID-19 pandemic affected your general health and wellbeing?

Q3. In your experience, what things, (such as processes or resources) that were present or available in your workplace influenced YOUR health and wellbeing during the pandemic, either in a positive or negative way?

*Prompt: this may include formal or informal resources, structures, supports, systems or processes*

*Prompt: once participant has finished, prompt interviewee to consider any other experiences to capture both positive and negative influences (as appropriate)*

Q4. What other things available in your workplace do you think influenced the wellbeing of your colleagues (but not necessarily your own) during the pandemic, either in a positive or negative way?

*Prompt: this may include suggestions for resources, structures, supports, systems or processes*

*Prompt: once participant has finished, prompt interviewee to consider any other experiences to capture both positive and negative influences (as appropriate)*

Q5. From your perspective, what things (such as processes or resources) that were present or available in your workplace have influenced, or are likely to influence, your workplace’s ability to recover from the disruptions of the pandemic either in a positive or negative way?

*Prompt: this may include formal or informal resources, structures, supports, systems or processes*

*Prompt: once participant has finished, prompt interviewee to consider any other experiences to capture both positive and negative influences (as appropriate)*

Q6. What do you think influenced your health and wellbeing during COVID-19 outside of the workplace?

Or What else beside the supports provided by your workplace helped you to maintain your health and wellbeing?

*Prompt: this may include formal or informal resources, structures, supports, systems or processes*

Q7. Do you have any suggestions for how optimal health and wellbeing can be promoted as we continue to recover from the COVID-19 pandemic at the:

Government level?

Health services level?

*Prompt: this may include suggestions for resources, structures, supports, systems or processes*

*On discussing suggestions, ask participants whether these are systems or resources that are in place in other organisations and/or settings.*

Q7. Finally, is there anything else that you would like to mention about maintaining and promoting health services’ staff health and wellbeing, during and beyond COVID-19?

Thank you for your participation. If you would like a copy of the final report, please let me know the best email to send this to.

**Participant demographic questions**

- Employment status:
  - Full time
  - Part time
  - Casual
  - Contractor
- Tenure with your health service:
  - <5 years
  - 5-<10 years
  - 10-<15 years
  - 15-<20 years
  - ≥20 years
- Role (greatest time fraction if >1 role):
  - Administration (non-client facing).
  - Client services/Reception
  - Clinical role (including Medical, Nursing, Allied Health, Pharmacy, Dental, Allied Health Assistants, Patient Services Assistants, etc.)
  - Program officer (non-clinical)
  - Support staff (e.g. food services, biomedical engineering, etc.)
  - Health service manager (e.g. program manager, discipline manager, senior manager, etc.)
  - Other (please specify)
- Which region of Victoria do you work in?
  - South West (including Geelong, Colac, Warrnambool)
  - North (including Bendigo, Echuca)
  - North West (including Mildura, Robinvale)
  - North East (including Wangaratta, Benalla)
  - East (including Bairnsdale, Lakes Entrance, Orbost)
  - South East (including Leongatha, Korumburra, Warragul)
  - Central/Grampians (including Ballarat, Ararat, Willaura)
  - Other (please specify)
